# Supplementary material for: Morphological and Molecular Characterization of Some Alternaria Species Isolated from Tomato Fruits Concerning Mycotoxin Production and Polyketide Synthase Genes
Source: MDPI journal article supplement (doi:10.3390/plants11091168), 2022-04-26
Supplement: s1 [file plants-1632411-supplementary.pdf › plants-1632411-supplementary.pdf]

**Figure S1.** The most common *Alternaria* toxins.

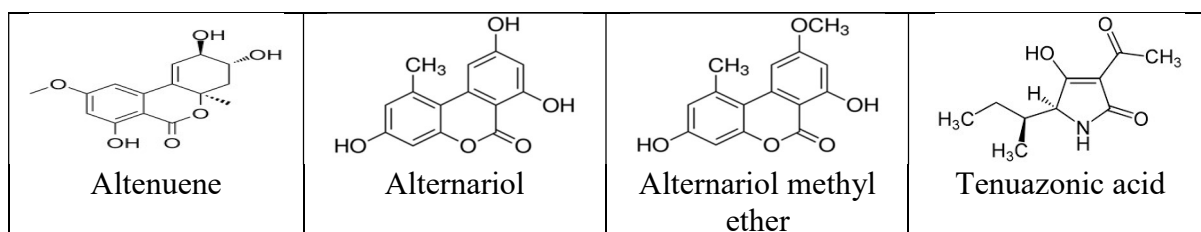

**Figure S2.** Tomato infected with *Alternaria*.

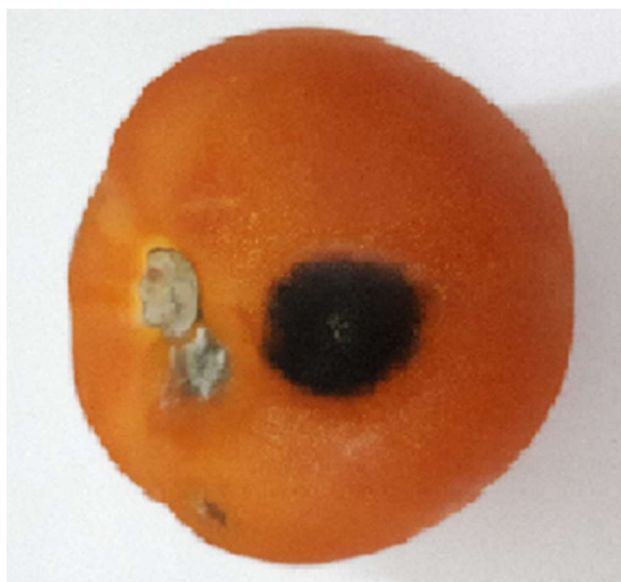

**Table S1.** Total counts, (calculated per (3x4) x 20 pieces), number of cases of isolation (NCI, out of 20), occurrence remarks (OR) and the relative importance value (RIV) of fungal genera and species isolated from tomato fruits.

| Genera & Species                     | TC  | %    | NCI&OR | RIV   |
|--------------------------------------|-----|------|--------|-------|
| <i>Alternaria</i>                    | 251 | 59.9 | 20 H   | 169.9 |
| <i>A.alternata</i>                   | 74  | 20.6 | 7 M    | 55.6  |
| <i>A.brasicicola</i>                 | 24  | 6.7  | 3 L    | 21.7  |
| <i>A.citri</i>                       | 72  | 20.1 | 6 M    | 50    |
| <i>A.radicina</i>                    | 49  | 13.6 | 6 M    | 43.6  |
| <i>A.tenussima</i>                   | 32  | 8.9  | 3 L    | 23.9  |
| <i>Aspergillus</i>                   | 17  | 4.7  | 3 L    | 19.7  |
| <i>A.fumigatus</i>                   | 1   | 0.3  | 1 R    | 5.3   |
| <i>A.niger</i>                       | 16  | 4.5  | 3 L    | 19.5  |
| <i>Cladosporium cladosporioides</i>  | 32  | 8.9  | 4 L    | 28.9  |
| <i>Cochliobolus</i>                  | 24  | 6.7  | 7 L    | 41.7  |
| <i>C.lunatus</i>                     | 14  | 3.9  | 4 L    | 23.9  |
| <i>C.spicifer</i>                    | 10  | 2.8  | 4 L    | 22.8  |
| <i>Rhizopus stolonifer</i>           | 1   | 0.3  | 1 R    | 5.3   |
| <i>Setosphaeria rostrata</i>         | 10  | 2.8  | 4 L    | 22.8  |
| Sterile mycelia (dark & white color) | 4   | 1.1  | 2 L    | 11.1  |
| <i>Ulocladium alternariae</i>        | 20  | 5.6  | 4 L    | 25.6  |
| Gross total count                    | 359 |      |        |       |
| Number of genera                     | 7   |      |        |       |
| Number of species                    | 13  |      |        |       |

Occurrence remarks: OR (out of 20 samples) H=high occurrence from 10-20 cases, M= moderate occurrence from 5 – 9 cases, L = low occurrence from 2 – 4 cases and R = rare occurrence 1 case.
